# Supplementary material
Source: Springer Nature journal article supplement (https://www.springermedizin.de/resource/supplementary/13030_2014_151_MOESM7_ESM.pdf/9644852)
Supplement: MOESM7 [file 9644852]

Negative judgement from others plus sufferers' negative perception

Low self-esteem, depression and social impairment

Embarrassment and stigma

Avoidance in social interaction

Anxiety, fear of rejection
